# Supplementary material for: Estuary-on-a-chip: unexpected results for the fate and transport of nanoparticles
Source: Royal Society of Chemistry journal article supplement (doi:10.1039/c8en00184g), 2018-01-01
Supplement: c8en00184g1.pdf [file c8en00184g1.pdf]

Supplemental information of

## Estuary on a chip: unexpected results for nanoparticles fate and transport

Julien Gigault<sup>1\*</sup>, Marianne Balaesque<sup>1</sup>, Hervé Tabuteau<sup>2\*</sup>,

<sup>1</sup>Laboratoire Géosciences Rennes,  
UMR6118 CNRS/Université de Rennes1,  
263 Av. Général Leclerc, 35000 Rennes  
[\\*julien.gigault@univ-rennes1.fr](mailto:julien.gigault@univ-rennes1.fr)

<sup>2</sup>Institut de Physique de Rennes,  
UMR6251 CNRS/Université Rennes 1,  
263 Av. Général Leclerc, 35000 Rennes  
[\\*herve.tabuteau@univ-rennes1.fr](mailto:herve.tabuteau@univ-rennes1.fr)

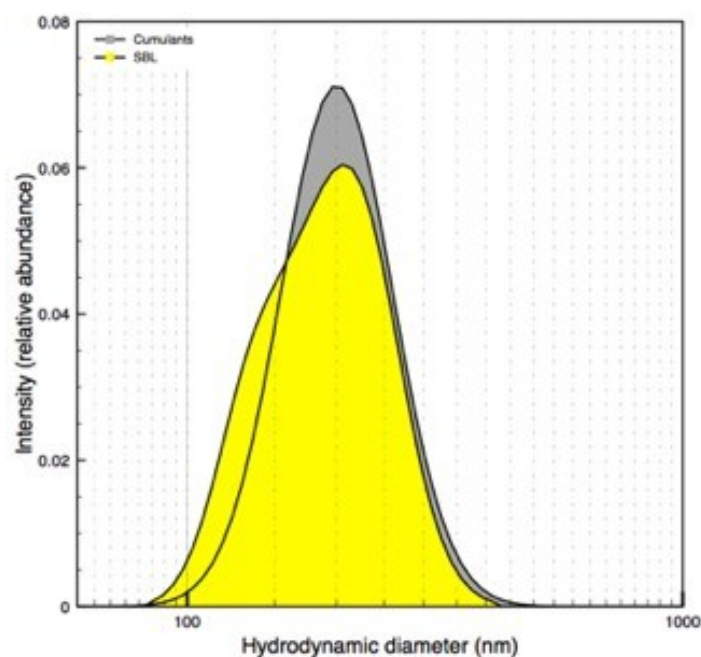

Figure S1: Size distribution of nC<sub>60</sub> obtained by DLS using Cumulants (grey) and SBL (yellow) algorithms as described in the experimental and method sections in the main text.

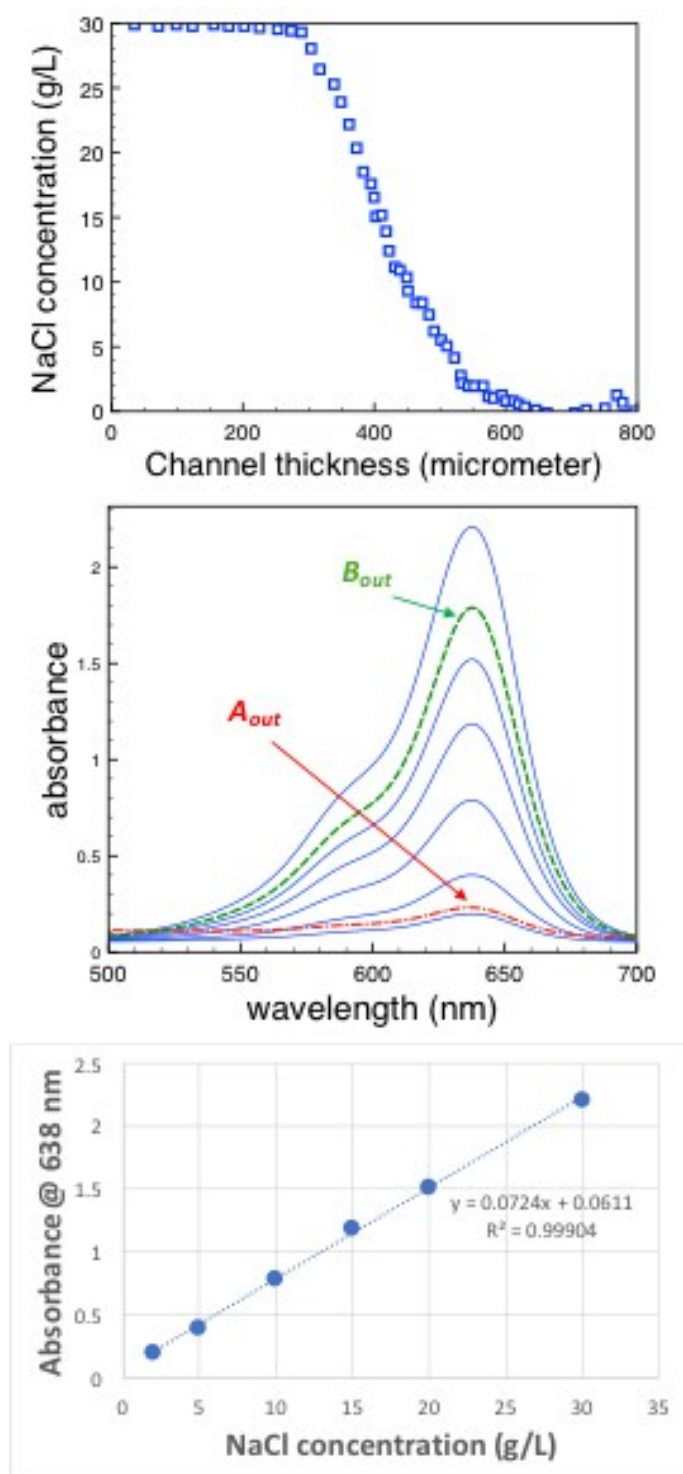

Figure S2: (top) Measured salinity gradient across the width of the microfluidic device. (middle) Absorbance spectrum of the 30 g L<sup>-1</sup> NaCl stock solution doped with the patent blue, used to calibrate the final average NaCl concentration at the two MD outlets ( $A_{out}$  and  $B_{out}$ ). (bottom) Absorbance Pic at 638 nm for various salt concentration.

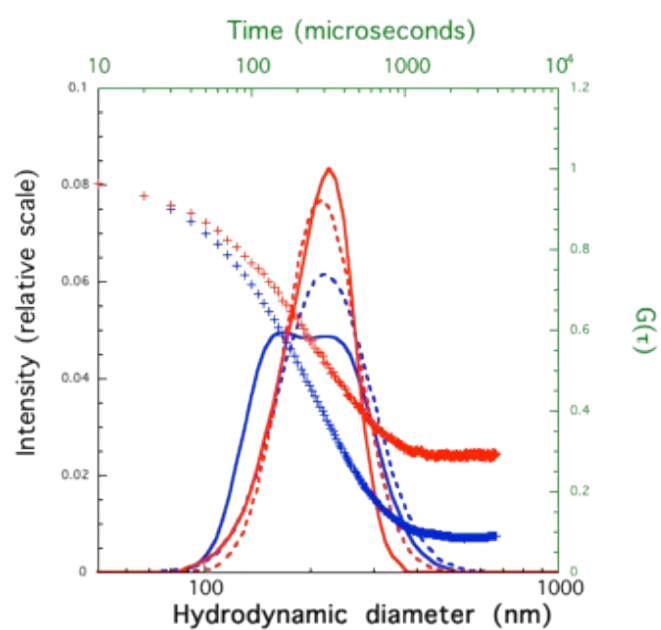

Figure S3 : Size distribution and the autocorrelation function (ACF) of the nC60 characterized by DLS in the collection vials localized at the outlets  $A_{out}$  and  $B_{out}$  in red and blue, respectively. The dashed-line and the solid-line correspond to the size distributions obtained by the Cumulants and SBL algorithm, respectively.

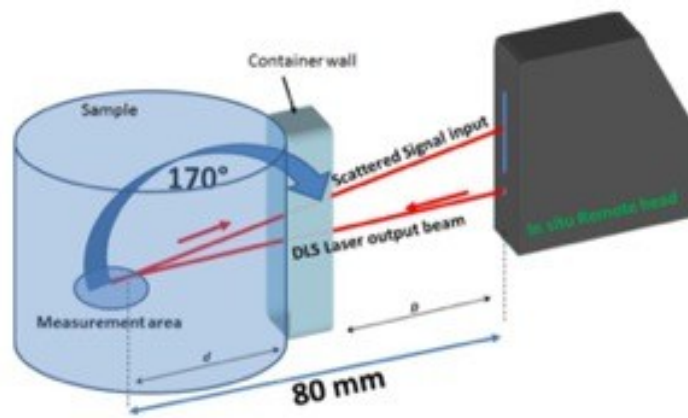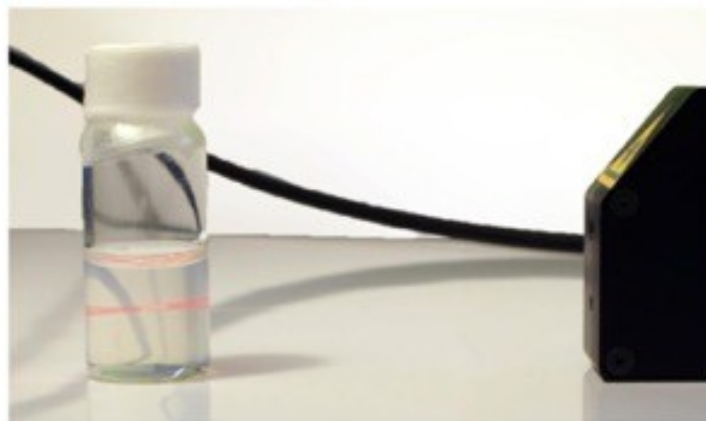

*In situ DLS remote head measurement configuration*

*Figure S4: Principle of the in-situ DLS measurement.*
